# Supplementary material
Source: publisher figshare collection journal article supplement (https://rs.figshare.com/ndownloader/files/14124851)
Supplement: Supplementary file 1 [file 14124851]

# Supporting Information for “Analyzing Diffusion and Flow-driven Instability using Semidefinite Programming”

Yutaka Hori\*, Hiroki Miyazako†

## Proof of Lemma 1

( $\Rightarrow$ ) Let  $\lambda_{\zeta,i}$  ( $i = 1, 2, \dots, n$ ) denote the roots of the characteristic polynomial  $\varphi(\zeta, s) = 0$ , and suppose  $\text{Re}[\lambda_{\zeta,i}] < 0$  for all  $\zeta \in \mathcal{Z}$ , Solving equation (6), we have

$$\tilde{\mathbf{c}}(\zeta, t) = \sum_{i=1}^n h_i e^{\lambda_{\zeta,i} t} \mathbf{v}_i(\zeta, 0), \quad (\text{A.1})$$

where  $\mathbf{v}_i(\zeta, 0)$  ( $i = 1, 2, \dots, n$ ) are eigenvectors of  $A - \zeta^2 D + j\zeta V$ , and  $h_i$  ( $i = 1, 2, \dots, n$ ) are constants determined from a given initial condition  $\tilde{\mathbf{c}}(\zeta, 0)$ . Since the roots of  $\lim_{\zeta \rightarrow \infty} \varphi(\zeta, s) = 0$  converge to those of  $|sI + D| = 0$ , which are  $-d_i < 0$  ( $i = 1, 2, \dots, n$ ) due to the continuity of the polynomial roots, the asymptotes do not converge to the imaginary axis. Thus, there exists  $\gamma > 0$  such that  $\max_{\zeta} \max_i \text{Re}[\lambda_{\zeta,i}] < -\gamma$ . Moreover, it follows that

$$\begin{aligned} \int_{\Omega} \|\mathbf{c}(x, t)\| dx &= \int_{\Omega} \left\| \frac{1}{2\pi} \sum_{\zeta \in \mathcal{Z}} \tilde{\mathbf{c}}(\zeta, t) e^{j\zeta x} \right\| dx \\ &= \int_{\Omega} \left\| \sum_{\zeta \in \mathcal{Z}} \frac{1}{2\pi} \left( \sum_{i=1}^n h_i e^{\lambda_{\zeta,i} t} \mathbf{v}_i(\zeta, 0) \right) e^{j\zeta x} \right\| dx \end{aligned} \quad (\text{A.2})$$

---

\*Department of Applied Physics and Physico-Informatics, Keio University, 223-8522 Kanagawa, Japan.

†Department of Information Physics and Computing, The University of Tokyo, Tokyo 113-8656, Japan.

The authors contributed equally to this work. Correspondence should be addressed to Yutaka Hori (yhor@appi.keio.ac.jp).

$$\begin{aligned}
&\leq \frac{1}{2\pi} e^{-\gamma t} \int_{\Omega} \left\| \sum_{\zeta \in \mathcal{Z}} \left( \sum_{i=1}^n h_i \mathbf{v}_i(\zeta, 0) \right) e^{j\zeta x} \right\| dx \\
&= \frac{1}{2\pi} e^{-\gamma t} \int_{\Omega} \|\mathbf{c}(x, 0)\| dx,
\end{aligned}$$

where the first equality is due to inverse Fourier transform. The right-hand side converges to zero as  $t \rightarrow \infty$ .

( $\Leftarrow$ ) We prove by contraposition. Suppose there exists  $\zeta = \zeta_0$  such that a root of  $\varphi(\zeta_0, s) = 0$  does not lie in the left-half complex plane, that is, there exists  $\hat{\lambda}$  such that  $\varphi(\zeta_0, \hat{\lambda}) = 0$  and  $\text{Re}[\hat{\lambda}] \geq 0$ . Then, (A.2) can be bounded from below by

$$\begin{aligned}
\int_{\Omega} \left\| \frac{1}{2\pi} \sum_{\zeta \in \mathcal{Z}} \tilde{\mathbf{c}}(\zeta, t) e^{j\zeta x} \right\| dx &= \int_{\Omega} \left\| \sum_{\zeta \in \mathcal{Z}} \frac{1}{2\pi} \left( \sum_{i=1}^n h_i e^{\lambda_{\zeta, i} t} \mathbf{v}_i(\zeta, 0) \right) e^{j\zeta x} \right\| dx \\
&\geq \frac{1}{2\pi} e^{\hat{\lambda} t} \|h_i \mathbf{v}_i(\zeta_0, 0)\|.
\end{aligned} \tag{A.3}$$

Since the right-hand side does not converge to zero in the limit of  $t \rightarrow \infty$  unless  $h_i \mathbf{v}_i(\zeta_0, 0) = 0$ , the system is not asymptotically stable.  $\square$

## Proof of Proposition 1

( $\Leftarrow$ ) Suppose there exists  $N_i$  such that  $M_i + N_i \succeq 0$  and  $\sum_{(j,k) \in \Theta_{\ell}} \nu_{jk}^{(i)} = 0$  for  $\ell = 2, 3, \dots, 2\ell_i + 2$ . It then follows that

$$\begin{aligned}
\mathbf{z}_i^T (M_i + N_i) \mathbf{z}_i &= \mathbf{z}_i^T M_i \mathbf{z}_i + \mathbf{z}_i^T N_i \mathbf{z}_i \\
&= \mathbf{z}_i^T M_i \mathbf{z}_i + \sum_{j=1}^{\ell_i+1} \sum_{k=1}^{\ell_i+1} \nu_{jk}^{(i)} z^j z^k \\
&= \mathbf{z}_i^T M_i \mathbf{z}_i + \sum_{\ell=2}^{2\ell_i+2} \left( \sum_{(j,k) \in \Theta_{\ell}} \nu_{jk}^{(i)} \right) z^{\ell} = \mathbf{z}_i^T M_i \mathbf{z} = \Delta_i(\zeta).
\end{aligned} \tag{A.4}$$

Thus,  $M_i + N_i \succeq 0$  implies  $\Delta_i(\zeta) \geq 0$  for all  $\zeta \in \mathbb{R}$ .

( $\Rightarrow$ ) The proof is based on the known result in algebra that  $\Delta_i(\zeta)$  can be decomposed into sums of squares when  $\Delta_i(\zeta) \geq 0$ . Here we show the proof for self-completeness of the document.

Suppose  $\Delta_i(\zeta) \geq 0$ . It is obvious that  $\deg(\Delta_i(\zeta))$  is even and the leading coefficient is positive. Otherwise  $\Delta_i(\zeta) < 0$  as  $\zeta \rightarrow \infty$  or  $\zeta \rightarrow -\infty$ . Moreover, all roots of  $\Delta_i(\zeta) = 0$  must be either pairs of complex conjugates and/or real numbers with even multiplicity because the sign of  $\Delta_i(\zeta)$  alters at the real roots with odd multiplicity. Therefore, we can write

$$\begin{aligned}\Delta_i(\zeta) &= \prod_p (\zeta - (\sigma_p + j\gamma_p)) (\zeta - (\sigma_p - j\gamma_p)) \prod_q (\zeta - \eta_q)^{2r_q} \\ &= \prod_p ((\zeta - \sigma_p)^2 + \gamma_p^2) \prod_q (\zeta - \eta_q)^{2r_q},\end{aligned}\tag{A.5}$$

where  $\{\sigma_p \pm j\gamma_p\}_p$  and  $\{\eta_q\}_q$  are the complex and real roots of  $\Delta_i(\zeta) = 0$ , respectively. The right-hand side of (A.5) shows that  $\Delta_i(\zeta)$  is the sums of squares. Thus, it is possible to write

$$\Delta_i(\zeta) = \sum_j (\mathbf{z}_i^T \boldsymbol{\phi}_{ij})^2 = \mathbf{z}_i^T \left( \sum_j \boldsymbol{\phi}_{ij} \boldsymbol{\phi}_{ij}^T \right) \mathbf{z}_i = \mathbf{z}_i^T \Phi_i \mathbf{z}_i,\tag{A.6}$$

where  $\boldsymbol{\phi}_{ij} := [\phi_{i0}, \phi_{i1}, \phi_{i2}, \dots, \phi_{i\ell_i}]^T \in \mathbb{R}^{\ell_i+1}$  is the vector of the coefficients of the polynomials in the  $j$ -th square, and  $\Phi_i := \sum_j \boldsymbol{\phi}_{ij} \boldsymbol{\phi}_{ij}^T$ . Since  $\Delta_i(\zeta)$  is also represented by  $\Delta_i(\zeta) = \mathbf{z}_i^T M_i \mathbf{z}_i$ , there exists a matrix  $N_i$  satisfying  $\mathbf{z}_i^T N_i \mathbf{z}_i = 0$  and  $\Phi_i = M_i + N_i$ . Thus, it follows from the definition of  $\Phi_i$  that  $M_i + N_i \succeq 0$ . Moreover,  $\mathbf{z}_i^T N_i \mathbf{z}_i = 0$  implies  $\sum_{(j,k) \in \Theta_\ell} \nu_{jk}^{(i)} = 0$  for  $\ell = 2, 3, \dots, 2\ell_i + 2$ .  $\square$

## Proof of Proposition 2

We first show the equivalence of (i) and (iii).

**Case of  $\mathcal{I} = [\underline{\zeta}, \bar{\zeta}]$**

Define  $\tilde{\zeta}$  by

$$\tilde{\zeta} := \frac{(\bar{\zeta} - \underline{\zeta})\zeta + (\bar{\zeta} + \underline{\zeta})}{2}.\tag{A.7}$$

By the change of variable, it follows that  $\Delta_i(\tilde{\zeta}) > 0$  for all  $\tilde{\zeta} \in \mathcal{I}$  is equivalent to  $\Delta_i(\zeta) > 0$  for all  $\zeta \in [-1, 1]$ . According to Fekete (1935) (see Theorem 2.6 of [1] for example),  $\Delta_i(\zeta)$  is non-negative for all  $\zeta \in [-1, 1]$  if and only if there exist non-negative polynomials  $f(\zeta)$

and  $g(\zeta)$  satisfying

$$\Delta_i(\zeta) = f(\zeta) + (1 - \zeta^2)g(\zeta). \quad (\text{A.8})$$

Since a univariate non-negative polynomial can always be decomposed into sums of squares (see the proof for Proposition 1), we can write  $f(\zeta) := \mathbf{z}_1^T K_i \mathbf{z}_1$  and  $g(\zeta) := \mathbf{z}_2^T L_i \mathbf{z}_2$  using positive semidefinite matrices  $K_i$  and  $L_i$ . The equality constraints are obtained by substituting these matrix representations into (A.8) and equating both sides of the equation.

**Case of  $\mathcal{I} = [\underline{\zeta}, \infty)$ :**

Let  $\tilde{\zeta} := \zeta + \underline{\zeta}$ . Then,  $\Delta_i(\tilde{\zeta}) \geq 0$  for  $\tilde{\zeta} \in [\underline{\zeta}, \infty)$  is equivalent to  $\Delta_i(\zeta) \geq 0$  for  $\zeta \in [0, \infty)$ . The latter condition is equivalent to the existence of non-negative functions  $f(\zeta)$  and  $g(\zeta)$  such that

$$\Delta_i(\zeta) = f(\zeta) + \zeta g(\zeta) \quad (\text{A.9})$$

(see Theorem 2.7 of [1]). This is equivalent to the existence of positive semidefinite matrices  $K_i$  and  $L_i$ , where  $f(\zeta) := \mathbf{z}_1^T K_i \mathbf{z}_1$  and  $g(\zeta) := \mathbf{z}_2^T L_i \mathbf{z}_2$ . The proof is complete by substituting these into (A.9) and writing each entry of both sides of the equation.

**Case of  $\mathcal{I} = (-\infty, \bar{\zeta}]$ :**

Let  $\tilde{\zeta} := -\zeta + \bar{\zeta}$ . Then,  $\Delta_i(\tilde{\zeta}) \geq 0$  for  $\tilde{\zeta} \in (-\infty, \bar{\zeta}]$  is equivalent to  $\Delta_i(\zeta) \geq 0$  for  $\zeta \in [0, \infty)$ . The rest of the proof is the same as the case of  $\mathcal{I} = [\underline{\zeta}, \infty)$ .

**(ii)  $\Leftrightarrow$  (iii):** The results are obtained by changing the variable  $\zeta$  in (A.8) and (A.9) with  $\tilde{\zeta}$  defined above for each interval  $\mathcal{I}$ .

## References

- [1] Lasserre JB. Moments, Positive Polynomials and Their Applications. Imperial College Press; 2009.
